# Supplementary material
Source: MDPI journal article supplement (https://www.mdpi.com/2411-5134/8/2/59)
Supplement: s1 [file s1]

Supplementary material

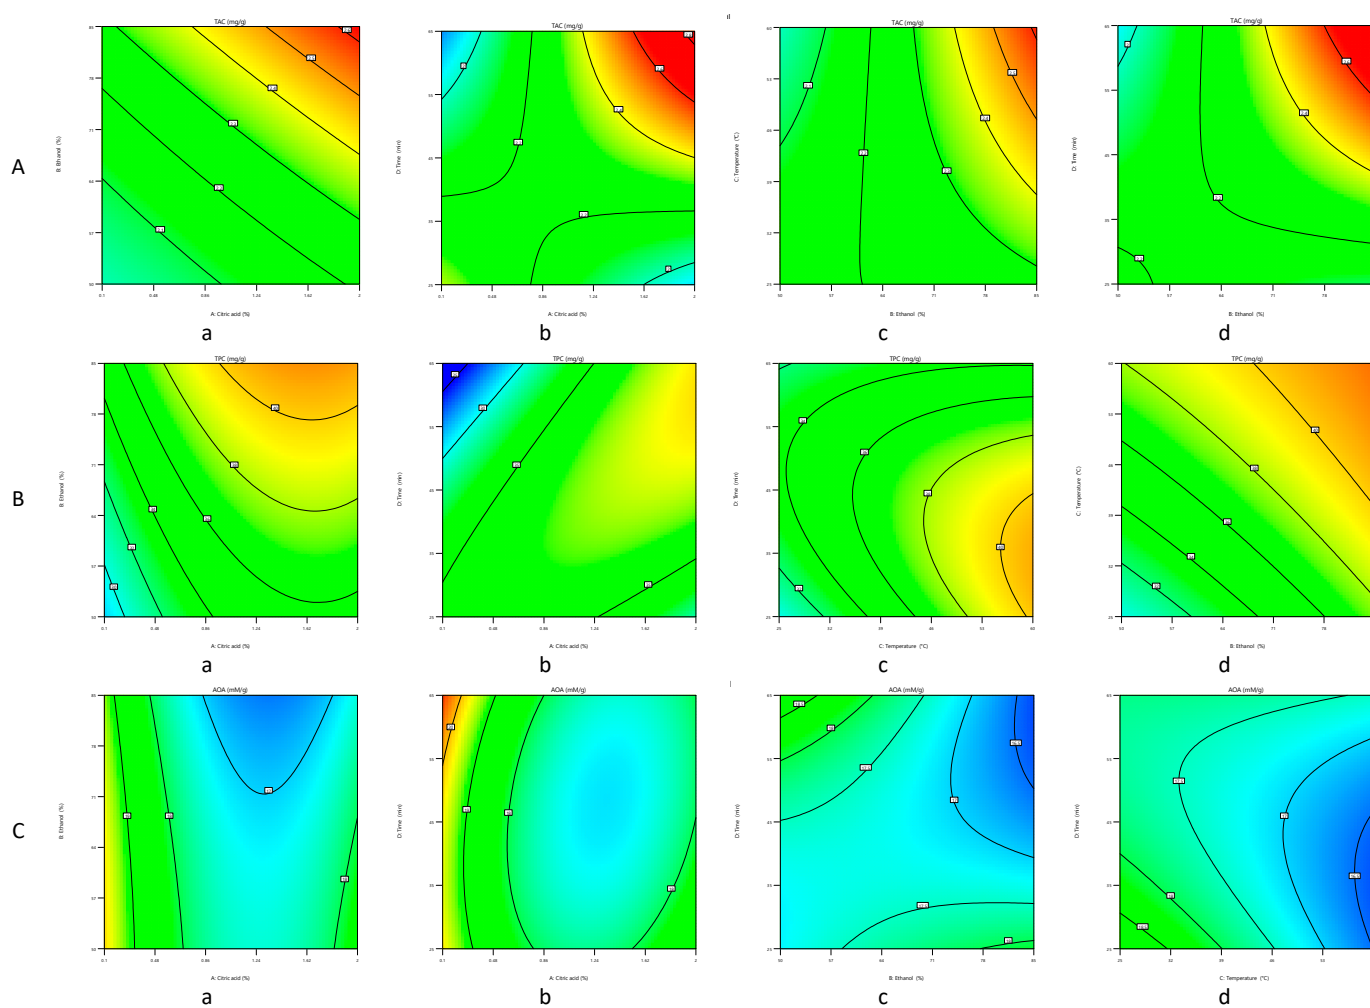

Figure S1. Second-order contour screening the variables effect on the TAC (A- a: Citric acid-Ethanol; b: Citric acid-Time; c: Ethanol-Temperature; d: Ethanol-Time), TPC (B- a: Citric acid-Ethanol; b: Citric acid-Time; c: Temperature-Time; d: Ethanol-Temperature) and AOA (C- a: Citric acid-Ethanol; b: Citric acid-Time; c: Ethanol-Time; d: Temperature-Time).
